# Supplementary material
Source: Springer Nature journal article supplement (https://www.springermedizin.de/resource/supplementary/12885_2008_1161_MOESM1_ESM.pdf/9471274)

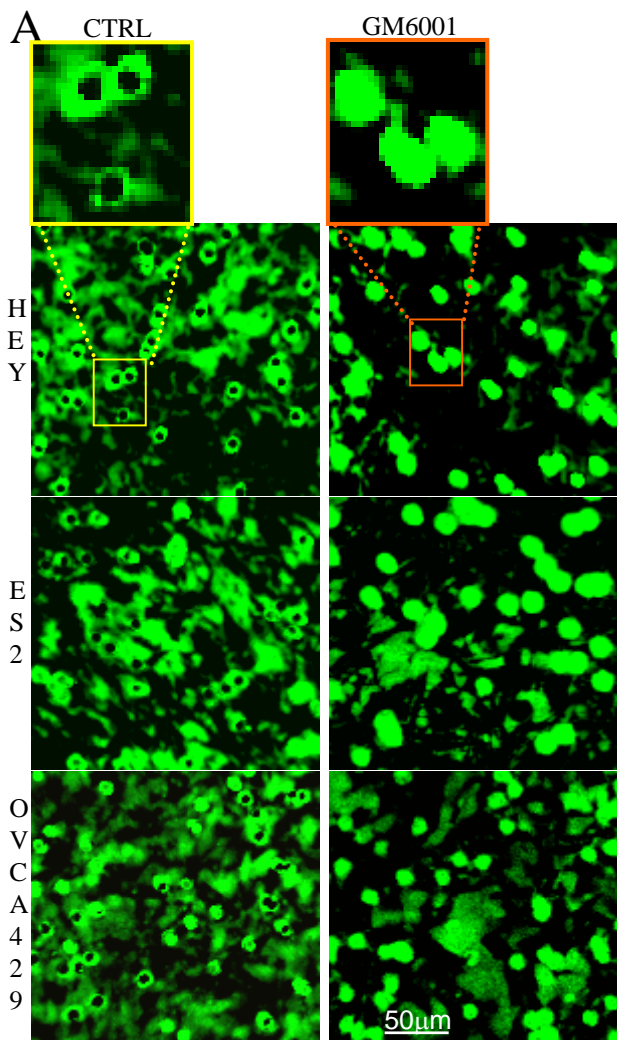

**B**

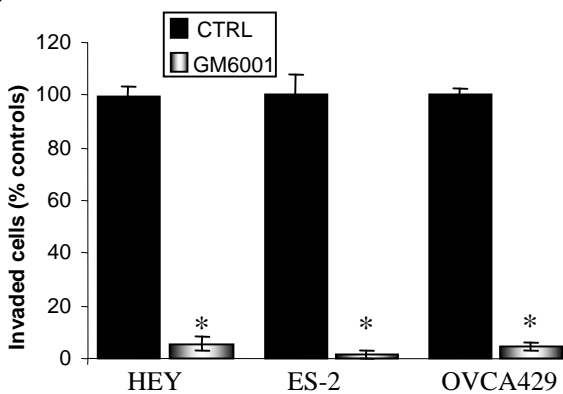

Supplement: MOESM1 [file 9471274]
